# Supplementary material
Source: ML conference proceedings conference paper supplement (https://openaccess.thecvf.com/content/CVPR_2020/html/Tsiami_STAViS_Spatio-Temporal_AudioVisual_CVPR_2020_paper.html)
Supplement: Supplementary file 1 [file Tsiami_STAViS_Spatio-Temporal_AudioVisual_CVPR_2020_supplemental.zip]

# Supplementary material

## STAViS: Spatio-Temporal AudioVisual Saliency Network

Antigoni Tsiami, Petros Koutras and Petros Maragos  
School of E.C.E., National Technical University of Athens, Greece  
{antsiami, pkoutras, maragos}@cs.ntua.gr

### 1. Configuration and parameters of the employed CNN architectures

In Tables 1, 2 we present the configuration and the parameters of the employed visual and audio sub-networks based on the 3D-ResNet-50 [5] and SounNet [1] architectures respectively. Figure 1 depicts the architecture of a 3D Bottleneck Block that constitutes the main building unit of the spatio-temporal 3D ResNet.

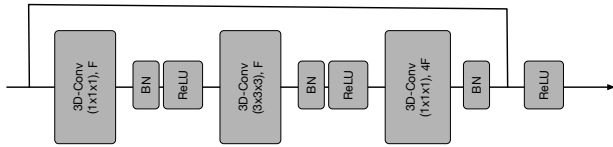

Figure 1. Architecture of the 3D Bottleneck Block.  $F$  denotes the number of feature maps of the 3D convolutional filter while BN refers to batch normalization.

### 2. Data splits and training

#### 2.1. Data splits

As mentioned in the main body of the paper, training has been performed by combining data from all datasets: For DIEM, the standard split from literature has been employed [2]. For the other 5 databases, where there is no particular split, we created 3 different splits of the data, in the sense of 3-fold cross-validation, with non-overlapping videos between train, validation and test sets for each split, uniformly split among datasets. Among these 3 different splits, different videos were placed in each split, namely, if video1 of dataset1 was placed in test set of split1, then it would not appear in any other test set. We ensured that all videos of each dataset would appear once in the test set of one split. The models' final performance was obtained by taking the average among all 3 splits. The same procedure was carried out both for our audiovisual and visual variants, in order to ensure a fair comparison. In Table 3, the detailed list of the video contents of each split is depicted for completeness.

#### 2.2. Training

In this subsection, the training process is described in more detail. First the visual-only network is trained, using as starting point the pretrained model in the Kinetics 400 database [5, 3] and employing DSAM skip connections. Afterwards, the whole audio-visual network is trained end-to-end, using the previously trained visual-only network as starting point for the visual path, while for the audio representation path we use as starting point the pretrained model from Flickr [1]. The network was trained either for 100 epochs or until loss did not further improve during 10 epochs, which usually happened around 60 epochs. Also, multi-step learning rate has been employed. The hyperparameters listed in the main body of the paper have mainly been decided upon experimentation.

### 3. Ablation study per database

Due to space restrictions, in the main body of the paper, the ablation study was presented as a table summarizing the results for all the videos contained in the employed databases. Here, in Tables 4, 5 the ablation study results and the state-of-the-art evaluation results have been concatenated and presented per database for completeness. For details about the state-of-the-art methods please refer to the main paper.

We notice that except for a few cases, audiovisual combinations outperform all other visual-only methods, including our visual only variant. Sometimes, the performance is better by a large margin, as for example in Coutrot2, which is the most "audiovisual" database. In Coutrot2, all audiovisual combinations outperform the visual-only by far, indicating that the network indeed learns to fuse auditory saliency in order to predict fixations closer to the human ones.

An interesting remark concerns SumMe database, which contains the most unedited, user-made videos. Many of its videos include footages, GoPro cameras, videos with artificial sound, etc., thus, the majority does not contain many actual audiovisual events. However, audiovisual

| Layer                          | 3D-Conv1              | 3D Max Pool           | 3D Conv2 Block        | 3D Conv3 Block        | 3D Conv4 Block        |
|--------------------------------|-----------------------|-----------------------|-----------------------|-----------------------|-----------------------|
| Number of feature maps ( $F$ ) | 64                    | 64                    | 64                    | 128                   | 256                   |
| Filter Kernel                  | $7 \times 7 \times 7$ | $3 \times 3 \times 3$ | Bottleneck            | Bottleneck            | Bottleneck            |
| Stride                         | $7 \times 7 \times 1$ | $2 \times 2 \times 2$ | $1 \times 1 \times 1$ | $2 \times 2 \times 2$ | $2 \times 2 \times 2$ |
| Number of Blocks               | -                     | -                     | 3                     | 4                     | 6                     |

Table 1. Configuration and parameters of the 3D ResNet architecture that has been employed in the patio-temporal network for visual saliency.

| Layer                      | Conv1 | Pool1 | Conv2 | Pool2 | Conv3 | Conv4 | Conv5 | Pool5 | Conv6 | Conv7 |
|----------------------------|-------|-------|-------|-------|-------|-------|-------|-------|-------|-------|
| Number of feature channels | 16    | 16    | 32    | 32    | 64    | 128   | 256   | 256   | 512   | 1024  |
| Filter Kernel              | 64    | 8     | 32    | 8     | 16    | 8     | 4     | 4     | 4     | 4     |
| Stride                     | 2     | 1     | 2     | 1     | 2     | 2     | 2     | 1     | 2     | 2     |
| Padding                    | 32    | 0     | 16    | 0     | 8     | 4     | 2     | 0     | 2     | 2     |

Table 2. Configuration and parameters of the Audio Representation Network.

methods have performed quite well. Surprisingly though, the best performance in 3 out of 5 metrics is achieved by an audio-only method, that localizes the sound source among the other redundant information included in SumMe videos. Regarding the rest 2 metrics, the best performance is achieved by two different state-of-the-art spatial-only visual saliency methods.

#### 4. Video demos of the proposed STAViS Network

In the supplementary material folder we have also included 4 demo videos (which correspond to the figures of the main body of the paper) that demonstrate better our approach over several video from all the employed databases.

#### References

- [1] Yusuf Aytar, Carl Vondrick, and Antonio Torralba. Soundnet: Learning sound representations from unlabeled video. In *Proc. Advances in Neural Information Processing Systems (NIPS)*, pages 892–900, 2016.
- [2] A. Borji, D. N. Sihite, and L. Itti. Quantitative analysis of human-model agreement in visual saliency modeling: A comparative study. *IEEE Trans. Image Process.*, 22(1):55–69, 2013.
- [3] Joao Carreira and Andrew Zisserman. Quo vadis, action recognition? a new model and the kinetics dataset. In *Proc. IEEE Conf. on Computer Vision and Pattern Recognition (CVPR)*, 2017.
- [4] Marcella Cornia, Lorenzo Baraldi, Giuseppe Serra, and Rita Cucchiara. Predicting Human Eye Fixations via an LSTM-based Saliency Attentive Model. *IEEE Trans. Image Process.*, 27(10):5142–5154, 2018.
- [5] Kensho Hara, Hirokatsu Kataoka, and Yutaka Satoh. Can spatiotemporal 3d cnns retrace the history of 2d cnns and imagenet. In *Proc. IEEE Conf. on Computer Vision and Pattern Recognition (CVPR)*, 2018.
- [6] Lai Jiang, Mai Xu, Tie Liu, Minglang Qiao, and Zulin Wang. Deepvs: A deep learning based video saliency prediction approach. In *Proc. European Conf. on Computer Vision (ECCV)*, 2018.
- [7] Kyle Min and Jason J. Corso. Tased-net: Temporally-aggregating spatial encoder-decoder network for video saliency detection. In *Proc. IEEE Int. Conf. on Computer Vision (ICCV)*, pages 2394–2403, 2019.
- [8] Juntao Pan, Cristian Canton Ferrer, Kevin McGuinness, Noel E O’Connor, Jordi Torres, Elisa Sayrol, and Xavier Giro-i Nieto. Salgan: Visual saliency prediction with generative adversarial networks. *Computer Vision and Image Understanding*, 2018.
- [9] Juntao Pan, Elisa Sayrol, Xavier Giro-i Nieto, Kevin McGuinness, and Noel E. O’Connor. Shallow and deep convolutional networks for saliency prediction. In *Proc. IEEE Conf. on Computer Vision and Pattern Recognition (CVPR)*, pages 598–606, 2016.
- [10] Wenguan Wang and Jianbing Shen. Deep visual attention prediction. *IEEE Trans. Image Process.*, 27(5):2368–2378, 2018.
- [11] Wenguan Wang, Jianbing Shen, Fang Guo, Ming-Ming Cheng, and Ali Borji. Revisiting video saliency: A large-scale benchmark and a new model. In *Proc. IEEE Conf. on Computer Vision and Pattern Recognition (CVPR)*, 2018.
- [12] Wenguan Wang, Jianbing Shen, Jianwen Xie, Ming-Ming Cheng, Haibin Ling, and Ali Borji. Revisiting video saliency prediction in the deep learning era. *IEEE Trans. Pattern Anal. Mach. Intell. (PAMI)*, pages 1–17, 2019.

|           | Test split 1                  | Test split 2                  | Test split 3                  |
|-----------|-------------------------------|-------------------------------|-------------------------------|
| Database  | video                         | video                         | video                         |
| AVAD      | V32_Dancers                   | V22_Tap2                      | V40_Guitar5                   |
| AVAD      | V6_Basketball1                | V34_Beat                      | V16_Drummer2                  |
| AVAD      | V33_Harp                      | V35_Squirrel                  | V30_Dog3                      |
| AVAD      | V17_Soccer1                   | V3_Speech3                    | V7_Basketball2                |
| AVAD      | V41_Violin1                   | V11_News4                     | V42_Violin2                   |
| AVAD      | V29_Dog2                      | V45_Darbuka2                  | V28_Dog1                      |
| AVAD      | V25_Piano1                    | V38_Guitar3                   | V5_Interview2                 |
| AVAD      | V31_Bird                      | V14_Conservation3             | V21_Tap1                      |
| AVAD      | V27_Piano3                    | V8_News1                      | V37_Guitar2                   |
| AVAD      | V15_Drummer1                  | V44_Darbuka1                  | V26_Piano2                    |
| AVAD      | V23_Tap3                      | V1_Speech1                    | V43_Violin3                   |
| AVAD      | V24_Tap4                      | V36_Guitar1                   | V19_Singing1                  |
| AVAD      | V13_Conservation2             | V2_Speech2                    | V4_Interview1                 |
| AVAD      | V9_News2                      | V18_Soccer2                   | V20_Singing2                  |
| AVAD      | V10_News3                     | V39_Guitar4                   | V12_Conservation1             |
| Coutrot 1 | clip4                         | clip1                         | clip2                         |
| Coutrot 1 | clip5                         | clip3                         | clip6                         |
| Coutrot 1 | clip10                        | clip7                         | clip9                         |
| Coutrot 1 | clip14                        | clip8                         | clip12                        |
| Coutrot 1 | clip15                        | clip11                        | clip13                        |
| Coutrot 1 | clip16                        | clip25                        | clip18                        |
| Coutrot 1 | clip17                        | clip27                        | clip19                        |
| Coutrot 1 | clip22                        | clip28                        | clip20                        |
| Coutrot 1 | clip24                        | clip29                        | clip21                        |
| Coutrot 1 | clip26                        | clip30                        | clip23                        |
| Coutrot 1 | clip32                        | clip31                        | clip34                        |
| Coutrot 1 | clip37                        | clip33                        | clip35                        |
| Coutrot 1 | clip38                        | clip36                        | clip40                        |
| Coutrot 1 | clip39                        | clip42                        | clip41                        |
| Coutrot 1 | clip44                        | clip43                        | clip45                        |
| Coutrot 1 | clip47                        | clip49                        | clip46                        |
| Coutrot 1 | clip48                        | clip52                        | clip51                        |
| Coutrot 1 | clip50                        | clip54                        | clip53                        |
| Coutrot 1 | clip56                        | clip55                        | clip59                        |
| Coutrot 1 | clip58                        | clip57                        | clip60                        |
| Coutrot2  | clip4                         | clip12                        | clip3                         |
| Coutrot2  | clip15                        | clip13                        | clip1                         |
| Coutrot2  | clip11                        | clip10                        | clip9                         |
| Coutrot2  | clip14                        | clip7                         | clip6                         |
| Coutrot2  | clip2                         | clip5                         | clip8                         |
| DIEM      | BBC_life_in_cold_blood        | BBC_life_in_cold_blood        | BBC_life_in_cold_blood        |
| DIEM      | BBC_wildlife_serpent          | BBC_wildlife_serpent          | BBC_wildlife_serpent          |
| DIEM      | DIY_SOS                       | DIY_SOS                       | DIY_SOS                       |
| DIEM      | advert_bbc4_bees              | advert_bbc4_bees              | advert_bbc4_bees              |
| DIEM      | advert_bbc4_library           | advert_bbc4_library           | advert_bbc4_library           |
| DIEM      | advert_iphone                 | advert_iphone                 | advert_iphone                 |
| DIEM      | ami_ib4010_closeup            | ami_ib4010_closeup            | ami_ib4010_closeup            |
| DIEM      | ami_ib4010_left               | ami_ib4010_left               | ami_ib4010_left               |
| DIEM      | harry_potter_6_trailer        | harry_potter_6_trailer        | harry_potter_6_trailer        |
| DIEM      | music_gummybear               | music_gummybear               | music_gummybear               |
| DIEM      | music_trailer_nine_inch_nails | music_trailer_nine_inch_nails | music_trailer_nine_inch_nails |
| DIEM      | news_tony_blair_resignation   | news_tony_blair_resignation   | news_tony_blair_resignation   |
| DIEM      | nightlife_in_mozambique       | nightlife_in_mozambique       | nightlife_in_mozambique       |

|       |                                     |                                     |                                     |
|-------|-------------------------------------|-------------------------------------|-------------------------------------|
| DIEM  | one_show                            | one_show                            | one_show                            |
| DIEM  | pingpong_angle_shot                 | pingpong_angle_shot                 | pingpong_angle_shot                 |
| DIEM  | pingpong_no_bodies                  | pingpong_no_bodies                  | pingpong_no_bodies                  |
| DIEM  | sport_scamblers                     | sport_scamblers                     | sport_scamblers                     |
| DIEM  | sport_wimbledon_federer_final       | sport_wimbledon_federer_final       | sport_wimbledon_federer_final       |
| DIEM  | tv_uni_challenge_final              | tv_uni_challenge_final              | tv_uni_challenge_final              |
| DIEM  | university_forum_construction_ionic | university_forum_construction_ionic | university_forum_construction_ionic |
| SumMe | Valparaiso_Downhill                 | Cooking                             | Base_jumping                        |
| SumMe | Car_railcrossing                    | Bus_in_Rock_Tunnel                  | Bike_Polo                           |
| SumMe | Bearpark_climbing                   | Uncut_Evening_Flight                | Scuba                               |
| SumMe | Playing_on_water_slide              | playing_ball                        | paluma_jump                         |
| SumMe | Fire_Domino                         | St_Maarten_Landing                  | Kids_playing_in_leaves              |
| SumMe | Cockpit_Landing                     | Paintball                           | Eiffel_Tower                        |
| SumMe | Saving_dolphins                     | Air_Force_One                       | Statue_of_Liberty                   |
| SumMe | Notre_Dame                          | car_over_camera                     | Excavators_river_crossing           |
| SumMe |                                     |                                     | Jumps                               |
| ETMD  | CHI_1_color                         | CRA_1_color                         | DEP_1_color                         |
| ETMD  | CHI_2_color                         | CRA_2_color                         | DEP_2_color                         |
| ETMD  | GLA_1_color                         | FNE_1_color                         | LOR_1_color                         |
| ETMD  | GLA_2_color                         | FNE_2_color                         | LOR_2_color                         |

Table 3. Detailed list of the video contents of each one of the three test splits. Note that regarding DIEM, the same videos are contained in every split, because there is a specific train, validation and test split from the literature.

| Dataset<br>Method                                    | DIEM          |                |                  |                 |                | Coutrot1      |                |                  |                 |                | Coutrot2      |                |                  |                 |                |
|------------------------------------------------------|---------------|----------------|------------------|-----------------|----------------|---------------|----------------|------------------|-----------------|----------------|---------------|----------------|------------------|-----------------|----------------|
|                                                      | CC $\uparrow$ | NSS $\uparrow$ | AUC-J $\uparrow$ | sAUC $\uparrow$ | SIM $\uparrow$ | CC $\uparrow$ | NSS $\uparrow$ | AUC-J $\uparrow$ | sAUC $\uparrow$ | SIM $\uparrow$ | CC $\uparrow$ | NSS $\uparrow$ | AUC-J $\uparrow$ | sAUC $\uparrow$ | SIM $\uparrow$ |
| Visual                                               | 0.5665        | 2.19           | 0.8792           | 0.6648          | 0.4719         | 0.4587        | 1.99           | 0.8617           | 0.5764          | 0.3842         | 0.6529        | 4.19           | 0.9405           | 0.6895          | 0.4470         |
| $L_1$ _AudioOnly                                     | 0.5362        | 2.05           | 0.8719           | 0.6596          | 0.4573         | 0.4444        | 1.93           | 0.8605           | 0.5789          | 0.3813         | 0.6917        | 4.67           | 0.9519           | 0.7013          | 0.4970         |
| $L_2$ _AudioOnly                                     | 0.5458        | 2.10           | 0.8737           | 0.6601          | 0.4569         | 0.4687        | 2.04           | 0.8669           | 0.584           | 0.3880         | 0.7223        | 4.99           | 0.9572           | 0.7054          | 0.5000         |
| $L_3$ _AudioOnly                                     | 0.5407        | 2.10           | 0.8719           | 0.6594          | 0.4552         | 0.4491        | 1.99           | 0.8618           | 0.5799          | 0.3745         | 0.7126        | 4.96           | 0.9568           | 0.7023          | 0.4849         |
| $L_1$ _S <sub>1</sub> <sup>av</sup>                  | 0.5489        | 2.13           | 0.8743           | 0.6582          | 0.4623         | 0.4516        | 2.01           | 0.8612           | 0.5803          | 0.3808         | 0.7102        | 5.01           | 0.9523           | 0.7023          | 0.4911         |
| $L_2$ _S <sub>1</sub> <sup>av</sup>                  | 0.5731        | 2.25           | 0.8839           | 0.6701          | 0.4847         | 0.4577        | 2.04           | 0.8602           | 0.5770          | 0.3892         | 0.7040        | 5.02           | 0.9480           | 0.6954          | 0.5017         |
| $L_3$ _S <sub>1</sub> <sup>av</sup>                  | 0.5712        | 2.25           | 0.8825           | 0.6693          | 0.4848         | 0.4623        | 2.07           | 0.8649           | 0.5820          | 0.3934         | 0.7076        | 5.08           | 0.9499           | 0.7003          | 0.5112         |
| $L_1$ _S <sub>2</sub> <sup>av</sup>                  | 0.525         | 2.04           | 0.8367           | 0.661           | 0.3519         | 0.4437        | 1.91           | 0.8354           | 0.5787          | 0.2994         | 0.6250        | 3.90           | 0.9168           | 0.6958          | 0.2785         |
| $L_2$ _S <sub>2</sub> <sup>av</sup>                  | 0.5259        | 2.04           | 0.8376           | 0.6607          | 0.3527         | 0.4448        | 1.92           | 0.8374           | 0.5789          | 0.3005         | 0.6257        | 3.90           | 0.9171           | 0.6952          | 0.2801         |
| $L_3$ _S <sub>2</sub> <sup>av</sup>                  | 0.5309        | 2.07           | 0.8344           | 0.6648          | 0.3553         | 0.4364        | 1.90           | 0.8218           | 0.5782          | 0.2924         | 0.6309        | 4.07           | 0.9161           | 0.6977          | 0.2883         |
| $L_3^{mul}$ _S <sub>2</sub> <sup>av</sup>            | 0.5594        | 2.14           | 0.8785           | 0.6681          | 0.4694         | 0.4588        | 2.00           | 0.8633           | 0.5823          | 0.3872         | 0.6983        | 4.70           | 0.9513           | 0.7035          | 0.4762         |
| $L_3^{mul}$ _S <sub>3</sub> <sup>av</sup> (proposed) | <b>0.5795</b> | <b>2.26</b>    | 0.8838           | <b>0.6741</b>   | 0.4824         | 0.4722        | 2.11           | <b>0.8686</b>    | <b>0.5847</b>   | 0.3935         | <b>0.7349</b> | <b>5.28</b>    | <b>0.9581</b>    | <b>0.7106</b>   | 0.5111         |
| $L_3^{mul}$ _S <sub>fus</sub> <sup>av</sup>          | <b>0.5795</b> | 2.25           | <b>0.8843</b>    | 0.6727          | <b>0.4877</b>  | 0.4679        | 2.08           | 0.8670           | 0.5835          | <b>0.3954</b>  | 0.7215        | 5.10           | 0.9551           | 0.7083          | <b>0.5137</b>  |
| DeepNet [9]                                          | 0.4075        | 1.52           | 0.8321           | 0.6227          | 0.3183         | 0.3402        | 1.41           | 0.8248           | 0.5597          | 0.2732         | 0.3012        | 1.82           | 0.8966           | 0.6000          | 0.2019         |
| DVA [10]                                             | 0.4779        | 1.97           | 0.8547           | 0.641           | 0.3785         | 0.4306        | 2.07           | 0.8531           | 0.5783          | 0.3324         | 0.4634        | 3.45           | 0.9328           | 0.6324          | 0.2742         |
| SAM [4]                                              | 0.4930        | 2.05           | 0.8592           | 0.6446          | 0.4261         | 0.4329        | 2.11           | 0.8571           | 0.5768          | 0.3672         | 0.4194        | 3.02           | 0.9320           | 0.6152          | 0.3041         |
| SalGAN [8]                                           | 0.4868        | 1.89           | 0.8570           | 0.6609          | 0.3931         | 0.4161        | 1.85           | 0.8536           | 0.5799          | 0.3321         | 0.4398        | 2.96           | 0.9331           | 0.6183          | 0.2909         |
| ACLNet [11, 12]                                      | 0.5229        | 2.02           | 0.8690           | 0.6221          | 0.4279         | 0.4253        | 1.92           | 0.8502           | 0.5429          | 0.3612         | 0.4485        | 3.16           | 0.9267           | 0.5943          | 0.3229         |
| DeepVS [6]                                           | 0.4523        | 1.86           | 0.8406           | 0.6256          | 0.3923         | 0.3595        | 1.77           | 0.8306           | 0.5617          | 0.3174         | 0.4494        | 3.79           | 0.9255           | 0.6469          | 0.2590         |
| TASED [7]                                            | 0.5579        | 2.16           | 0.8812           | 0.6579          | 0.4615         | <b>0.4799</b> | <b>2.18</b>    | 0.8676           | 0.5808          | 0.3884         | 0.4375        | 3.17           | 0.9216           | 0.6118          | 0.3142         |

Table 4. Ablation study and state-of-the-art evaluation for databases DIEM, Coutrot1 and Coutrot2.

| Method \ Dataset                    | AVAD          |             |               |               |               | SumMe         |             |               |               |               | ETMD          |             |               |               |               |
|-------------------------------------|---------------|-------------|---------------|---------------|---------------|---------------|-------------|---------------|---------------|---------------|---------------|-------------|---------------|---------------|---------------|
|                                     | CC ↑          | NSS ↑       | AUC-J ↑       | sAUC ↑        | SIM ↑         | CC ↑          | NSS ↑       | AUC-J ↑       | sAUC ↑        | SIM ↑         | CC ↑          | NSS ↑       | AUC-J ↑       | sAUC ↑        | SIM ↑         |
| Visual                              | 0.6041        | 3.07        | 0.9157        | 0.5900        | 0.4431        | 0.4180        | 1.98        | 0.8848        | 0.6477        | 0.3325        | 0.5602        | 2.84        | 0.9290        | 0.7278        | 0.4121        |
| $L_1$ -AudioOnly                    | 0.5836        | 2.89        | 0.9176        | 0.5949        | 0.4413        | 0.4072        | 1.93        | 0.8833        | 0.6520        | 0.3328        | 0.5407        | 2.71        | 0.9276        | 0.7298        | 0.4086        |
| $L_2$ -AudioOnly                    | 0.6107        | 3.07        | 0.9199        | 0.5975        | 0.4475        | <b>0.4413</b> | 2.12        | <b>0.8908</b> | 0.6665        | <b>0.3442</b> | 0.5580        | 2.84        | 0.9302        | 0.7343        | 0.4087        |
| $L_3$ -AudioOnly                    | 0.6009        | 3.07        | 0.9185        | 0.5956        | 0.4351        | 0.4097        | 1.95        | 0.8838        | 0.6527        | 0.3218        | 0.5504        | 2.81        | 0.9285        | 0.7301        | 0.3995        |
| $L_1$ - $S_1^{av}$                  | 0.6035        | 3.13        | 0.9166        | <b>0.5984</b> | 0.4463        | 0.4069        | 1.94        | 0.8826        | 0.6463        | 0.3271        | 0.5493        | 2.82        | 0.9277        | 0.7264        | 0.4073        |
| $L_2$ - $S_1^{av}$                  | <b>0.6198</b> | <b>3.26</b> | 0.9201        | 0.5949        | <b>0.4700</b> | 0.4146        | 2.01        | 0.8872        | 0.6514        | 0.3359        | 0.5599        | 2.90        | 0.9303        | 0.7256        | 0.4238        |
| $L_3$ - $S_1^{av}$                  | 0.6159        | 3.25        | 0.9195        | 0.5934        | 0.4690        | 0.4136        | 1.99        | 0.8856        | 0.6520        | 0.3391        | 0.5658        | <b>2.93</b> | 0.9312        | 0.7292        | 0.4296        |
| $L_1$ - $S_2^{av}$                  | 0.5886        | 2.96        | 0.9013        | 0.5951        | 0.3156        | 0.4035        | 1.91        | 0.8618        | 0.6540        | 0.2470        | 0.5418        | 2.74        | 0.911         | 0.7346        | 0.2773        |
| $L_2$ - $S_2^{av}$                  | 0.5912        | 2.98        | 0.9021        | 0.5957        | 0.3172        | 0.4038        | 1.91        | 0.8627        | 0.6542        | 0.2476        | 0.5423        | 2.74        | 0.9116        | 0.7346        | 0.2784        |
| $L_3$ - $S_2^{av}$                  | 0.5860        | 2.96        | 0.8899        | 0.5947        | 0.3036        | 0.4110        | 1.97        | 0.8710        | 0.6513        | 0.2620        | 0.5530        | 2.86        | 0.9161        | 0.7311        | 0.3070        |
| $L_3^{mul}$ - $S_2^{av}$            | 0.5966        | 2.98        | 0.9179        | 0.5914        | 0.4449        | 0.4188        | 1.99        | 0.8853        | 0.6566        | 0.3358        | 0.5551        | 2.80        | 0.9292        | 0.7333        | 0.4136        |
| $L_3^{mul}$ - $S_3^{av}$ (proposed) | 0.6086        | 3.18        | 0.9196        | 0.5936        | 0.4578        | 0.4220        | 2.03        | 0.8883        | 0.6562        | 0.3373        | <b>0.5690</b> | <b>2.93</b> | 0.9316        | 0.7317        | 0.4251        |
| $L_3^{mul}$ - $S_{fused}^{av}$      | 0.6162        | 3.21        | <b>0.9216</b> | 0.5952        | 0.4690        | 0.4183        | 2.01        | 0.8871        | 0.6547        | 0.3403        | 0.5669        | 2.91        | <b>0.9317</b> | 0.7318        | <b>0.4280</b> |
| DeepNet [9]                         | 0.3831        | 1.85        | 0.8690        | 0.5616        | 0.2564        | 0.3320        | 1.55        | 0.8488        | 0.6451        | 0.2274        | 0.3879        | 1.90        | 0.8897        | 0.6992        | 0.2253        |
| DVA [10]                            | 0.5247        | 3.00        | 0.8887        | 0.5820        | 0.3633        | 0.3983        | 2.14        | 0.8681        | 0.6686        | 0.2811        | 0.4965        | 2.72        | 0.9039        | 0.7288        | 0.3165        |
| SAM [4]                             | 0.5279        | 2.99        | 0.9025        | 0.5777        | 0.4244        | 0.4041        | <b>2.21</b> | 0.8717        | 0.6728        | 0.3272        | 0.5068        | 2.78        | 0.9073        | 0.7310        | 0.3790        |
| SalGAN [8]                          | 0.4912        | 2.55        | 0.8865        | 0.5799        | 0.3608        | 0.3978        | 1.97        | 0.8754        | <b>0.6882</b> | 0.2897        | 0.4765        | 2.46        | 0.9035        | <b>0.7463</b> | 0.3117        |
| ACLNet [11, 12]                     | 0.5809        | 3.17        | 0.9053        | 0.5600        | 0.4463        | 0.3795        | 1.79        | 0.8687        | 0.6092        | 0.2965        | 0.4771        | 2.36        | 0.9152        | 0.6752        | 0.3290        |
| DeepVS [6]                          | 0.5281        | 3.01        | 0.8968        | 0.5858        | 0.3914        | 0.3172        | 1.62        | 0.8422        | 0.6120        | 0.2622        | 0.4616        | 2.48        | 0.9041        | 0.6861        | 0.3495        |
| TASED [7]                           | 0.6006        | 3.16        | 0.9146        | 0.5898        | 0.4395        | 0.4288        | 2.10        | 0.8840        | 0.6570        | 0.3337        | 0.5093        | 2.63        | 0.9164        | 0.7117        | 0.3660        |

Table 5. Ablation study and state-of-the-art evaluation for databases AVAD, SumMe and ETMD.
